# Supplementary material for: Climatic controls on mountain glacier basal thermal regimes dictate spatial patterns of glacial erosion
Source: Copernicus journal article supplement (doi:10.5194/esurf-2021-26), 2021-03-31
Supplement: Supplementary file [file esurf-2021-26-AC2-supplement.pdf]

Dear Dr. Delaney,

Thank you for your review of our manuscript. We appreciate your thoughtful review and constructive comments. We will respond to the comments below, with the reviewer's comments shown in italic and our response in normal font.

*1. Most importantly, to what degree is basal shear stress (largely influenced by driving stress), and not basal temperature, responsible for the change in glacier sliding, and thus erosion? Lower glacier surface gradients at high elevations may cause a decrease in sliding and thus erosion there. This is discussed in the Methods of the paper where the Weertman-style sliding law is explained. Changes in driving stress are what Seguinot and Delaney (esurf-dis) suggest as the process responsible for variations in erosion. Given the experiment design, basal thermal conditions might be a factor, however, the role and effects of basal shear-stress (and other impacts on glacier sliding) should be thoroughly considered and addressed.*

*Some changes in erosion might be linked to basal conditions. However, the role of increased precipitation in glacier erosion suggests to me that glacier topography and in morphology could well play a role in the increased erosion observed in those model runs. At high elevations, increased precipitation means increased ice flux down glacier and potentially high driving stresses.*

*For me, these processes (basal temperature and shear stress) should be attributed clearly.*

Thanks for the comment. We agree that basal shear stress is another important factor that can potentially influence basal sliding in our simulations, in addition to the basal thermal regime. PISM can calculate the basal shear stress and we plot the results in Fig. R1 a-c. The warm and wet case (Fig. R1c) predicts slightly higher basal shear stress in major valleys than the cold and dry case (Fig. R1a). This can explain the faster erosion rates in the warm and wet case than the cold and dry case. However, the basal shear stress does not show a significant variation in spatial patterns between these cases, especially in major valleys. This makes our point stronger that climate influences the spatial patterns of glacial erosion through the basal thermal regime.

We also want to point out that the differences in basal shear stress are not caused by differences in driving stress. We calculate the driving stress based on ice thickness and ice surface gradient (Fig. R1d-f). The results show that the driving stress distributions are very

similar in the three cases, especially in the major valleys where we observe different basal shear stress (Fig. R1d-f). This is because these climate settings produce glaciers with similar ELAs, therefore, similar ice thickness, which eventually gives us similar driving stresses. The similar driving stress patterns are implied by our Fig. 2, where we show that the ice thickness distributions are similar in the three cases. We interpret the differences in basal shear stress as a result of the temperature-dependent ice stiffness. In a cold climate, the ice is stiffer and therefore a higher fraction of the driving stress is balanced by the membrane stress within the ice than in a warm climate. Thus the basal shear stress is lower in a cold climate.

We will add a discussion about basal shear stress in the revised manuscript. Thanks for the constructive comment.

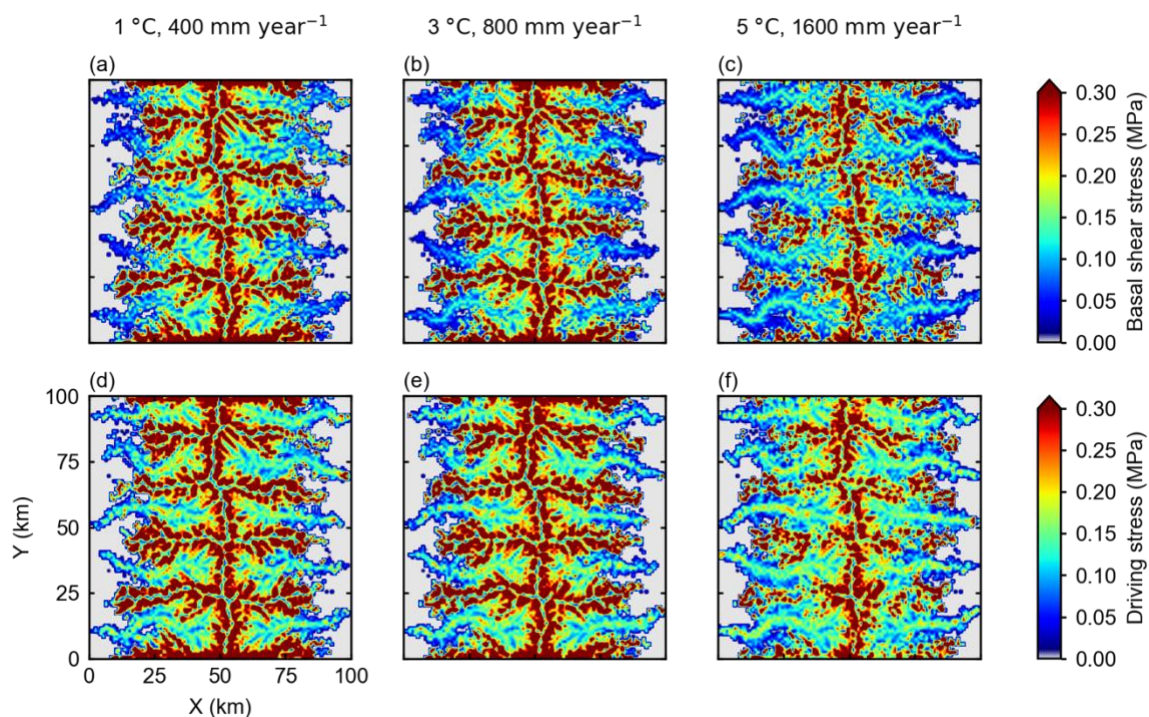

Figure R1 Driving stresses (a-c) and basal shear stresses (d-f) in three cases with similar ELAs.

*2. The time transgressive nature of the climate forcing is not addressed. I was left wondering why this forcing was applied, as opposed to a steady forcing, given the lack of discussion about temporal variations in erosion. By examining temporal patterns of glacier erosion, the authors may find that similar basal conditions produce different erosion rates due to changes in glacier morphology and driving stress. If this is the case, the authors might be able argue that basal conditions are responsible for background erosion rates, however, variations in erosion largely come from changes in climate and glacier dynamics. Nonetheless, these timescales and processes should be parsed and explained in order to present the cases where*

*basal temperature is the primary control on glacier erosion. In this way, the findings herein and from Seguinot and Delaney (esurf-dis) might be able to complement each other.*

Thanks for your comment. In our earlier work (Figs. 4 and 5 in Lai and Anders, 2020, EPSL) we found that a cyclic climate produces more erosion at high elevations than a steady climate, simply because high-elevation regions are covered by glaciers for a longer time than low elevations in a glacial-interglacial cycle. Therefore, we used a cyclic forcing in this study to get more “realistic” patterns of glacial erosion.

You raised a good point on temporal variations in erosion caused by changes in glacial morphology and driving stress. We did examine the temporal changes in glacial erosion in our experiments. In the figure below, we plot the glacial erosion rate during a 1000-year window at 40,000, 80,000, and 90,000 years. The climate reaches the coldest glacial period at 80,000 years, and the climatic conditions are the same at 40,000 and 90,000 years. We observe an inward migration and an acceleration of glacial erosion during deglaciation in the cold and dry case (Fig. R2g), which is similar to your findings in Seguinot and Delaney (Esurf diss.). Your simulations suggest that such a change in erosion is caused by the change in ice surface gradient, which influences the basal shear stress. In our simulations, this mechanism may contribute to the change in erosion, but we cannot exclude the possibility that the feedbacks between eroded topography and glacier dynamics may also lead to an increase in basal shear stress. The deeper valleys and steeper slopes in the eroded topography allow for thicker glaciers with a steeper surface gradient, which presumably can raise the basal shear stress.

We will add a paragraph describing the temporal evolution of glacial erosion in the revised manuscript.

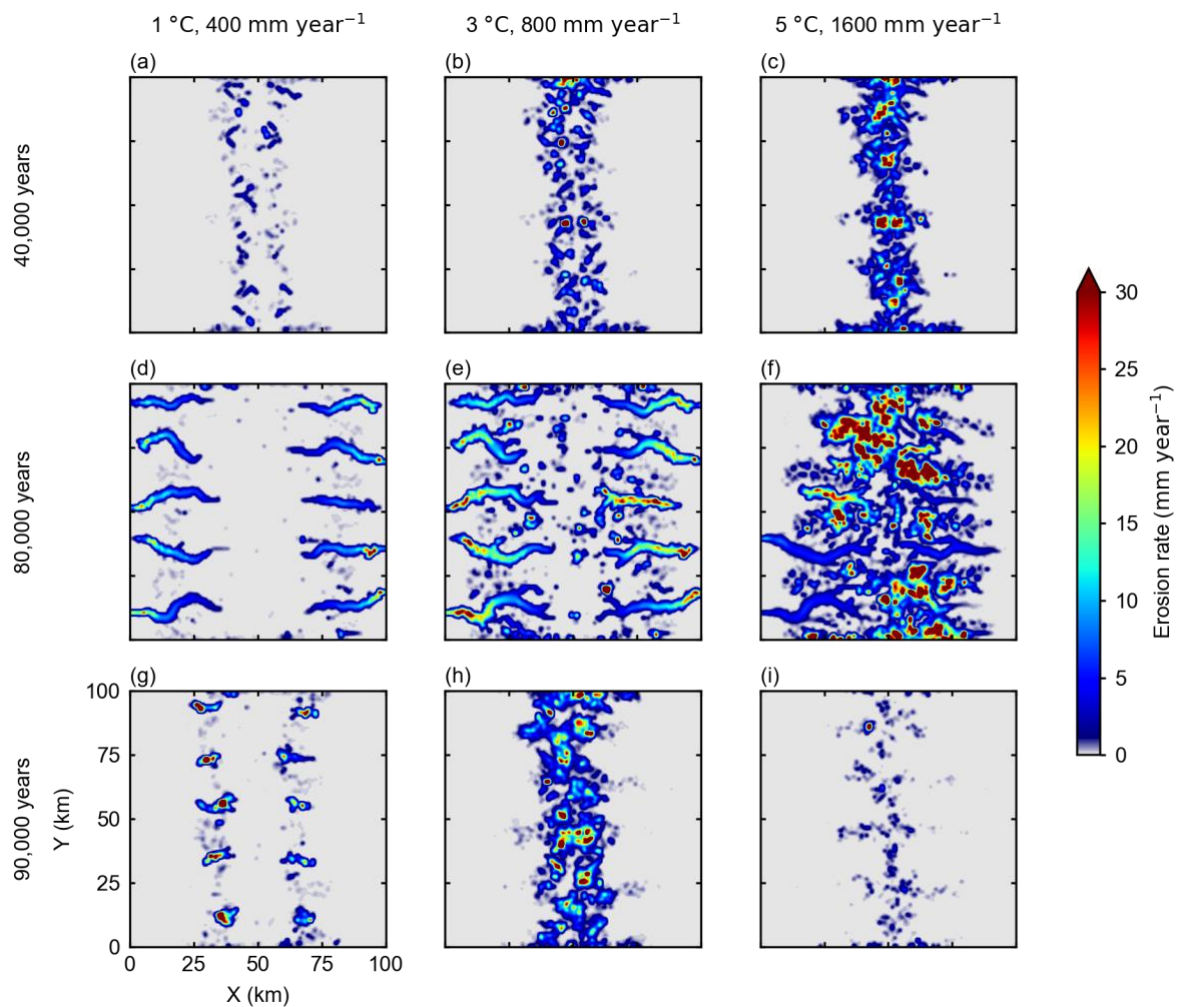

Figure R2 Temporal evolution of glacial erosion rates.

*3. Related to the last question, the response time of the glacier temperature changes is very slow and it can take a long time for the glacier to reach an equilibrium. I did not adequately understand the initial conditions prescribed to the glacier and I am uncertain the degree to which these conditions could propagate into the results. Basically, it seems that the conclusion that basal temperature drives the erosion rate might be a manifestation of the initial condition chosen and not necessarily the time transgressive response to variations in temperature. The impact of the initial condition could well be a reasonable result, however, it should be made clear and it is a limited component of how the natural system operates and responds to climate. Some commentary on the response of glacier sliding and temperature to climate, and the time scale there of, will help with some of these results.*

Thanks for the comment, it's a good point. We agree that the response time of glacier temperature change is important and therefore, the initial conditions can influence the results.

For this reason, our experiment did not aim to compare the temporal variations in basal thermal regimes in response to climate change during a glacial-interglacial cycle. What we compare in our experiments is the basal thermal regimes in different “regions” with different climates. For example, in Figs. 2 and 3, “1 °C, 400 mm/year” means that during the coldest glacial period the mean annual sea-level temperature is 1 °C and the mean annual precipitation is 400 mm/year. Similarly, the “5 °C, 1600 mm/year” case has a warmer and wetter climate. All the simulations have a temperature change of 8 °C from the warmest interglacial time to the coldest glacial period, and the initial topography is ice-free in all cases. The ice-free initial condition is reasonable given that the 8 °C temperature change only allows for a very limited ice cover during the interglacial periods in most cases. When we compare the results of “1 °C, 400 mm/year” and “5 °C, 1600 mm/year”, we are actually comparing two mountain ranges at two “locations” with different climates, rather than investigating the temporal variation of basal thermal regimes in a mountain range with climate changing from a cold and dry one to a warm and wet one.

### ***Specific Comments***

• ***Introduction*** *I found the introduction well written. A couple of notes though. 1) I would recommend discussing glacier sliding more and the contributing factors. The effective manifestation of erosion here is sliding, so sliding is of interest.*

Thanks for the suggestion. The main purpose of this study is to examine how climate changes the basal thermal conditions and consequently, basal sliding/glacial erosion. Therefore, in the introduction, we try to make a point that the basal thermal regime is a first-order control on where erosion can occur. Furthermore, although our model uses a sliding-based erosion law, that does not mean basal thermal regime cannot influence erosion in other ways. Therefore, we focus on the discussion of how the basal thermal regime may control glacial erosion in different ways. In summary, while basal shear stress, subglacial hydrology, etc. are important factors that control the rate of sliding, we think it is unnecessary and probably misleading to discuss all of them.

*Also 2) consider discussing the role of understanding the glacier dynamics in the context of interpreting the sedimentary record (papers by Koppes, Fernandez and Ganti).*

This is a very nice suggestion. We will add this in the introduction and also in the discussion.

*Also, I found many unattributed statements in the introduction. Find citations for these or omit.*

Most parts of the introduction have citations to support them. We assume you are referring line 57-65 because we think this the only part with some unattributed statements. We are also unsatisfied with this part because this is a description of the influence of climate on basal thermal regimes in the model rather than in real glaciers. Therefore, we will remove this part in the revised manuscript.

• **Ln 66–79** *The findings of Anderson et al. (2012) may well fit well in to this paragraph.*

Thanks for the suggestion. We will add a citation to Anderson et al. (2012).

• **Methods** *In addition to the comments in the letter, some issues arose in this section. What are the initial conditions of the glacier model? Is a spin up established? Is the fluvial topography in a steady state? If not, how long was the model run for prior to the initialization of the model run? Are the fluvial and glacier models running concurrently over the same parts of the domain during the model runs?*

Most of these issues have already been described in the original manuscript. We will add a description of the initial conditions of the glacier dynamics model in the revised manuscript.

• **Section 2.2.1** *A linear erosion rule is used, which should be attributed to Humphrey and Raymond (1994). However, Herman et al., (2015), Koppes et al. (2015), and Cook et al. (2020) all empirically explain why a non-linear law likely fits better. Furthermore, the theory in Hallet (1979) suggests that an exponent of 2 should be used. Herman et al. (2021) discusses this in detail. I am not saying this erosion rule is wrong, but it should be justified. Also, work by Humphrey and Raymond (1994), Herman et al., (2015), Koppes et al. (2015), and Cook et al. (2020) all implement data to validate the rule, so citing them not only provides proper attribution, but strengthens the method.*

We will add a short discussion to justify this. Thanks for the suggestion.

• **Ln 134** *“Fluvial landscape in Landlab”...what is the relationship between this and the Braun and Willet 2013 paper discussed above. Also Deal and Prasicek (2020) might be able to provide some good insight in to fluvial glacial relationships, depending on the relationship between fluvial and glacial erosion.*

Landlab implements Braun and Willet 2013 paper’s method for node ordering, which provides an efficient way to calculate drainage area. Deal and Prasicek (2020) is a valuable contribution, but we don’t think this is very relevant since we do not aim to compare the steady-state glacial landscapes with fluvial landscapes in our work.

• **Section 2.4/2.5** *I found some of these aspects of the design complicated. Would a cartoon or timeline with climate forcing and model interaction in addition to the map in Fig. 1 help clarify?*

We will add a figure of the glacial/interglacial forcing in Fig. 1.

• **Ln 165** *“PISM over an unchanging topography.” I am a bit confused by this statement as I though topography was evolving (line 100).*

We run two simulations for each climate, one with erosion and one without erosion.

• **Results** *As stated in the letter, basal conditions are not the only driver of glacier sliding, so basal shear-stress should be implemented into this results and findings.*

We will add a discussion about basal shear stress in the revised manuscript.

• **Ln 214** *I was expecting a section titled “Temporal patters of glacier erosion” here.*

We will add a paragraph talking about the temporal patterns.

• **Section 3.3** *As mentioned the letter, the amount of time needed for the englacial temperature to adjust to the climate can be very large (10’s of thousands of years). It seems that some comments on the basal temporal variations and the response time of the glacier bed to atmospheric forcing would help this section.*

As we explained above, it is not our goal to evaluate the temporal evolution of the basal thermal regime in response to climate change during a glacial-interglacial cycle.

- **Section 3.4** *Coupled with sensitivity to temperature, precipitation can affect glacier morphology and thus the stress balance. Generally, glaciers with a steeper mass balance gradient will slide faster and thus may increase in erosion.*

We agree. In this section we focus on the spatial patterns of glacial erosion and our point is that precipitation changes the basal thermal regime and therefore the patterns of erosion.

- **Section 3.5** *Nice commentary. I am glad this is discussed.*

Thanks!

- **Ln 294–305** *The findings of Anderson et al. (2012) could fit well here. Also, it may be appropriate to find an alternate explanation (average glacier conditions), but do findings here support that?*

A citation to Anderson et al. 2012 will be added.

The alternative explanation is not a conclusion of our results and we do provide references for this argument in the original manuscript. We will add more references to make it clear. Combining this argument and our results suggest that cirque-based ELAs estimation is not a good proxy for glacial erosion patterns.

- **Ln 303–305** *Here some temporal evolution topics are discussed, more would be appreciated.*

See response above.

- **Ln 294–312** *A recent paper by Mariotti et al. (2021) highlights the impact of climate on glacial erosion in the sediment record. I believe this paper could help the authors and give context to some findings.*



We will discuss the implication of our results for the long-term temporal evolution of glacial erosion rates in the revised manuscript. Thanks for the suggestion.

• **Ln 315** *“role of precipitation. . . .” Cook et al. 2020 speaks to this.*

This is true, but we think it’s still “limited” in comparison with the large amount of literatures looking at the role of precipitation for fluvial and hillslope processes. We cite Cook et al. 2020 later in this paragraph.

• **Ln 317** *What process is responsible for precipitation changing the thermal regime? This needs some explanation, and does the relevant process fit the timescale of the erosion in the model run?*

This is a good point. On Ln 323 in the original manuscript, we interpret this as the changes of the melting point of ice in response to changes in ice thickness due to precipitation.

Intuitively, high precipitation rates are able to increase the ice thickness and overburden pressure at the base of ice. Therefore, the melting point of ice is lowered and we can have warm-based basal ice without changing the temperature. We believe this is what happens in the model but it does not necessarily mean it also happens in nature, considering PISM is still a “shallow” model and does not have a vertical flow component. In real glaciers, the vertical flow can also change the englacial temperature field. Because the model is not a perfect representation of nature, we decide not to make an argument on what process is responsible for precipitation changing the basal thermal regime/glacial erosion patterns. Instead, by comparing with field measurements of glacial erosion rates (Cook et al, 2020; Koppes et al. 2015), we suggest that our model can capture the bulk influence of precipitation on glacial erosion, i.e., more precipitation means more erosion.

• **Ln 329–333** *This is true and precipitation is not always represented well. However, it can be represented by having a large (steep) mass balance gradient in a linear mass-balance forcing relationship. Some caution should used here.*

It is true that we could use the mass balance gradient to represent precipitation. Our point here is that the influence of precipitation on the ELA is not adequately represented in this

framework. Usually, the ELA is just set at the elevation with a temperature of 0 degree Celsius.

• **Ln 334–339** *Comparison with Koppes et al. (2015) is very difficult. Some of the differences are discussed (i.e. land vs marine terminating). However, such a comments also requires considering the evolution of glaciers as they respond to climate.*

Thanks for the comment. We will reword this part to make it clear that our results and Koppes et al. are not really an apples-to-apples comparison. In particular, our rates are average glacial erosion rates over a glacial-interglacial cycle, while Koppes et al. report short-term rates that are inferred from sedimentary records.

Figures

• **Figs 1–3** *There is a black box around the figs in the print version. Not a big deal but worth a thought.*

Not sure why. The final manuscript will have figures in pdf formats and hopefully they will be fine.

• **Figs 4** *Would it wise to plot "Warm basal ice" vs "Glacial erosion"?*

We think this is a nice illustration of how the distribution of warm basal ice controls the spatial patterns of glacial erosion.

Best,

Jingtao Lai

References

Lai, J. and Anders, A. M.: Tectonic controls on rates and spatial patterns of glacial erosion through geothermal heat flux, *Earth Planet. Sci. Lett.*, 543, 116348, doi:10.1016/j.epsl.2020.116348, 2020.
